# Supplementary material
Source: ML conference proceedings conference paper supplement (https://openaccess.thecvf.com/content/CVPR2023/html/Zhu_ConQueR_Query_Contrast_CVPR_2023_paper.html)
Supplement: Supplementary file 3 [file Zhu_ConQueR_Query_Contrast_CVPR_2023_supplemental.zip]

Archive with 2 entries (2 files):
- supp_conquer_cam_ready.pdf
- __MACOSX/._supp_conquer_cam_ready.pdf
